# Supplementary material
Source: PubMed Central journal article supplement (PMC4662931)

# Supplemental figure 2

## A Heatmap of metabolite levels (GC-TOF)

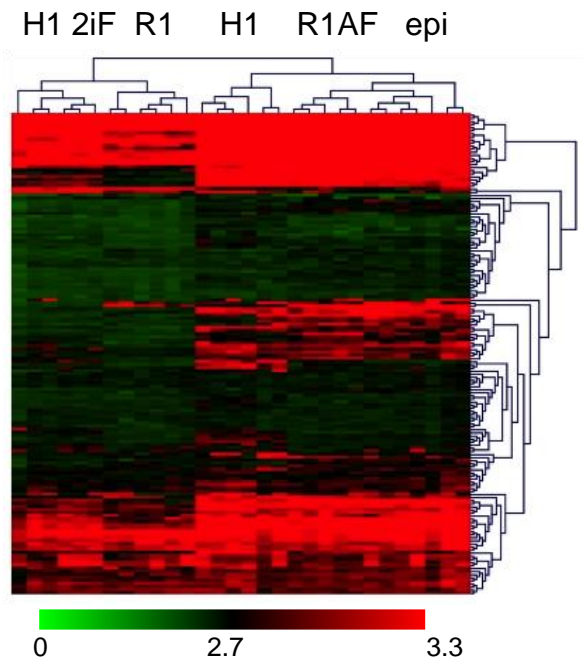

## B

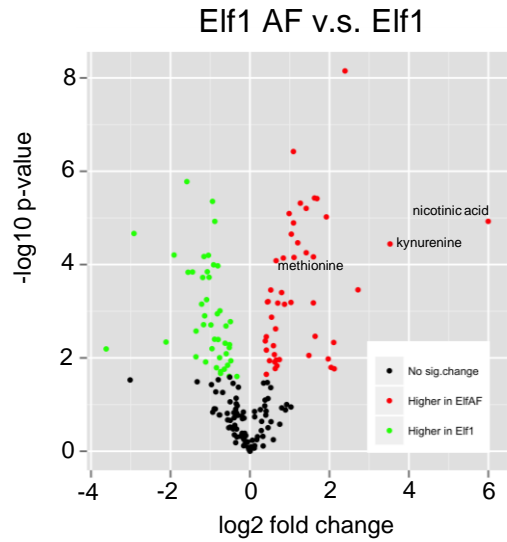

## C GC metabolomics

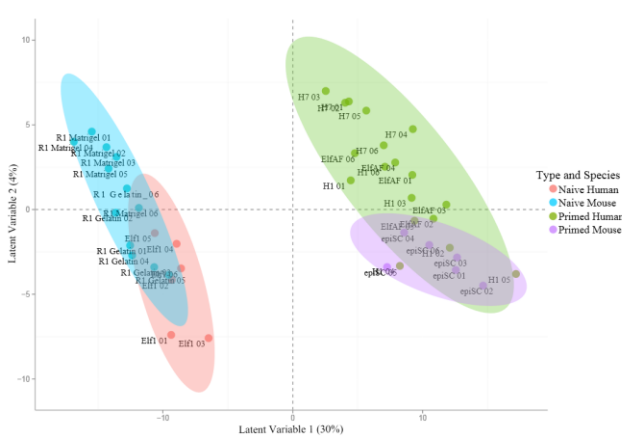

## D

## LC metabolomics

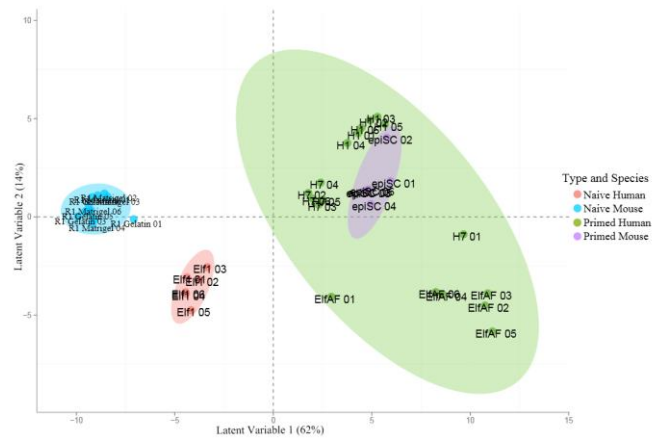

Supplement: NIHMS727862-supplement-3.pdf [file NIHMS727862-supplement-3.pdf]
