# Supplementary material
Source: PubMed Central journal article supplement (PMC4662931)

Supplemental figure 5

**A** H3K4me3 (Chan et al)

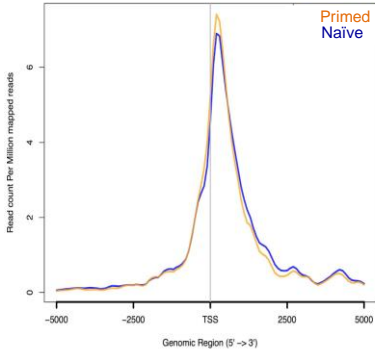

**B** H3K27ac (Chan et al)

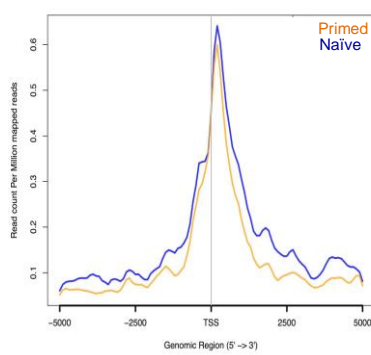

**C** H3K4me1 (Gafni et al)

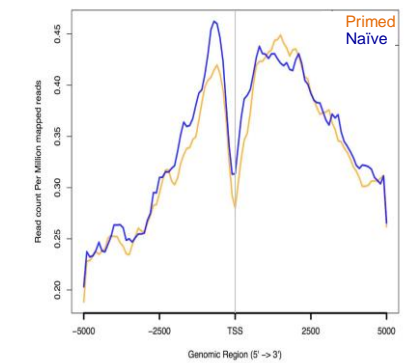

**D** H3K4me3 (Gafni et al)

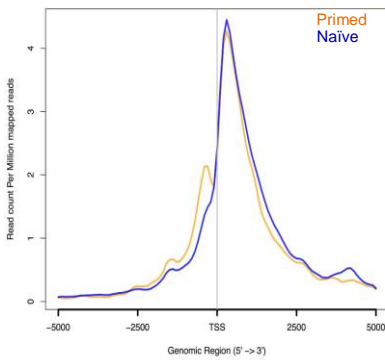

**E** H3K9me3 (Gafni et al)

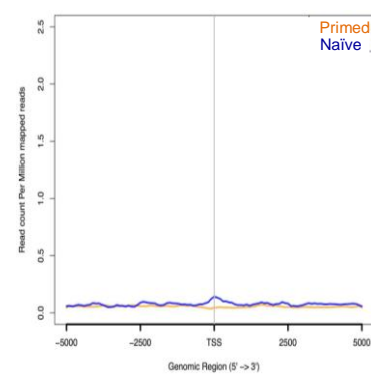

**F** H3K27ac (Gafni et al)

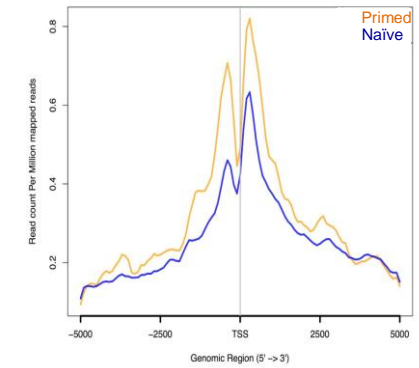

**G** H3K4me3 (Theunissen et al)

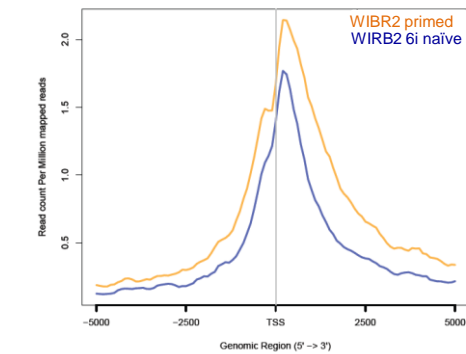

**H**

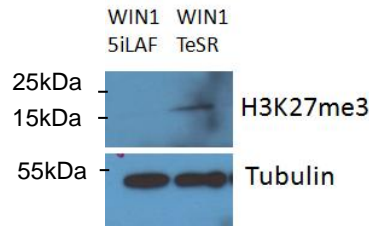

**I** Histone methyltransferases

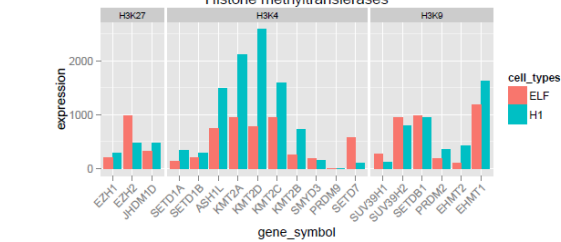

**K**

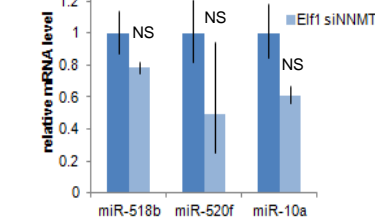

**L**

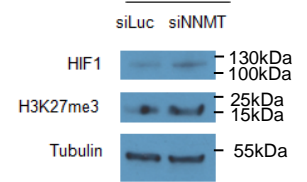

**J** Histone demethylases

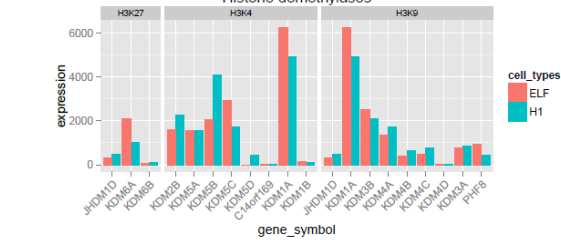

**M**

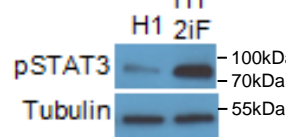

**N** qPCR, relative levels of NNMT, normalized to  $\beta$ -actin, n=3

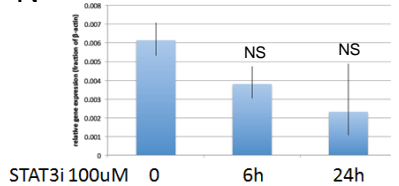

Supplement: NIHMS727862-supplement-6.pdf [file NIHMS727862-supplement-6.pdf]
