# Supplementary material
Source: PubMed Central journal article supplement (PMC4662931)

**Figure 1J**

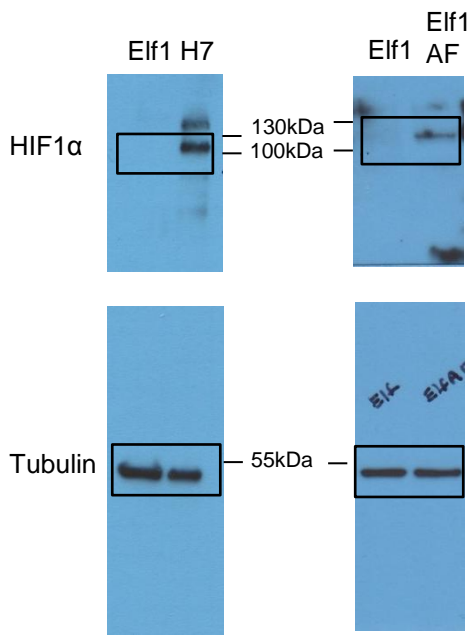

**Figure 5B**

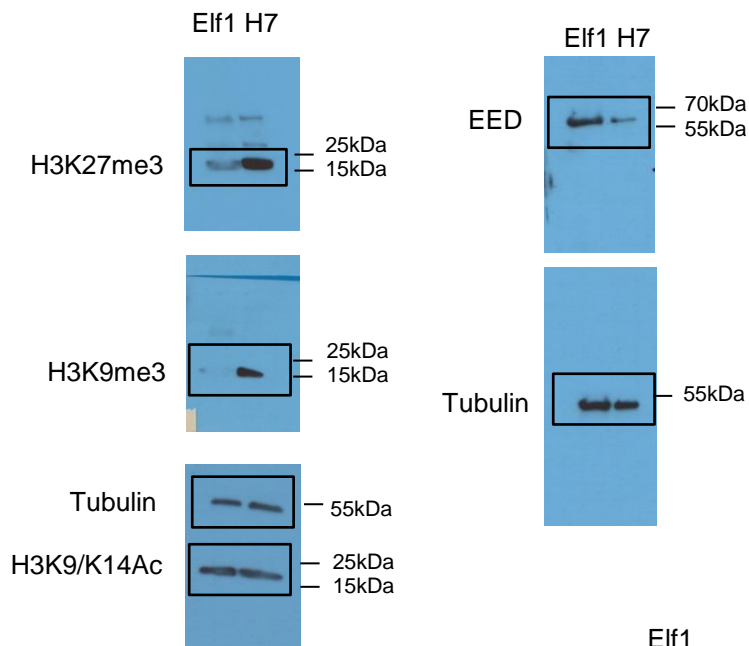

**Figure 1M**

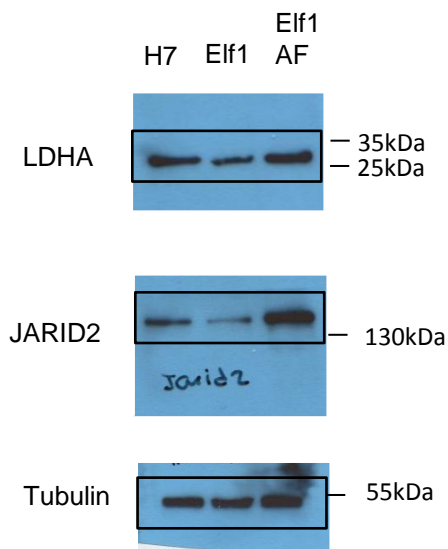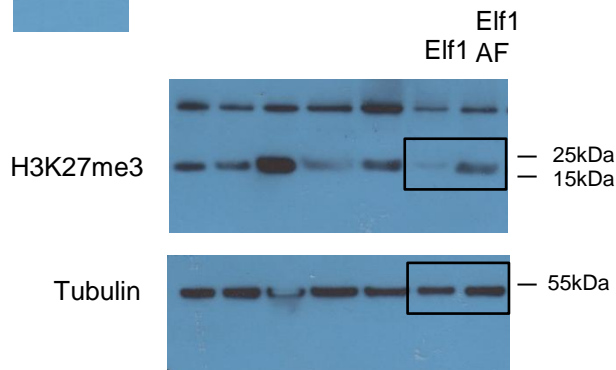

**Figure 5D**

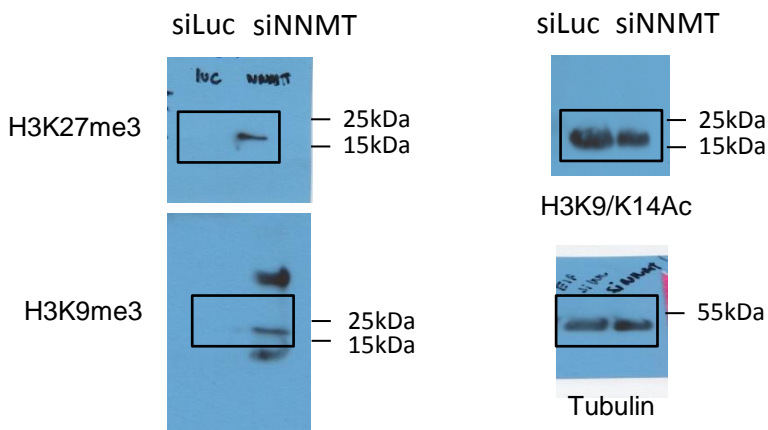

**Figure 5F**

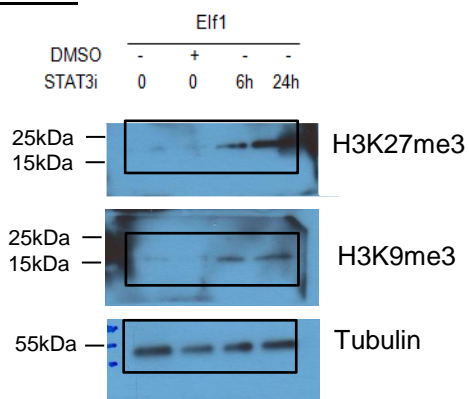

**Figure 7F**

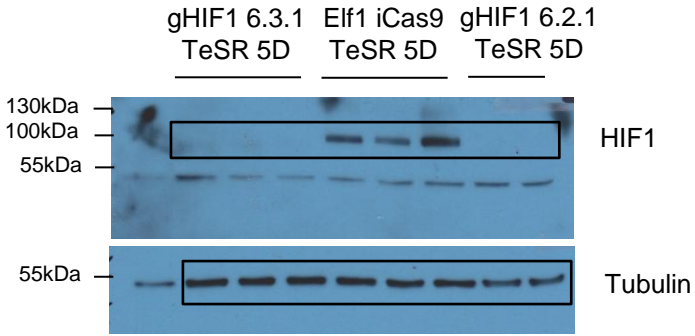

**Figure 8E**

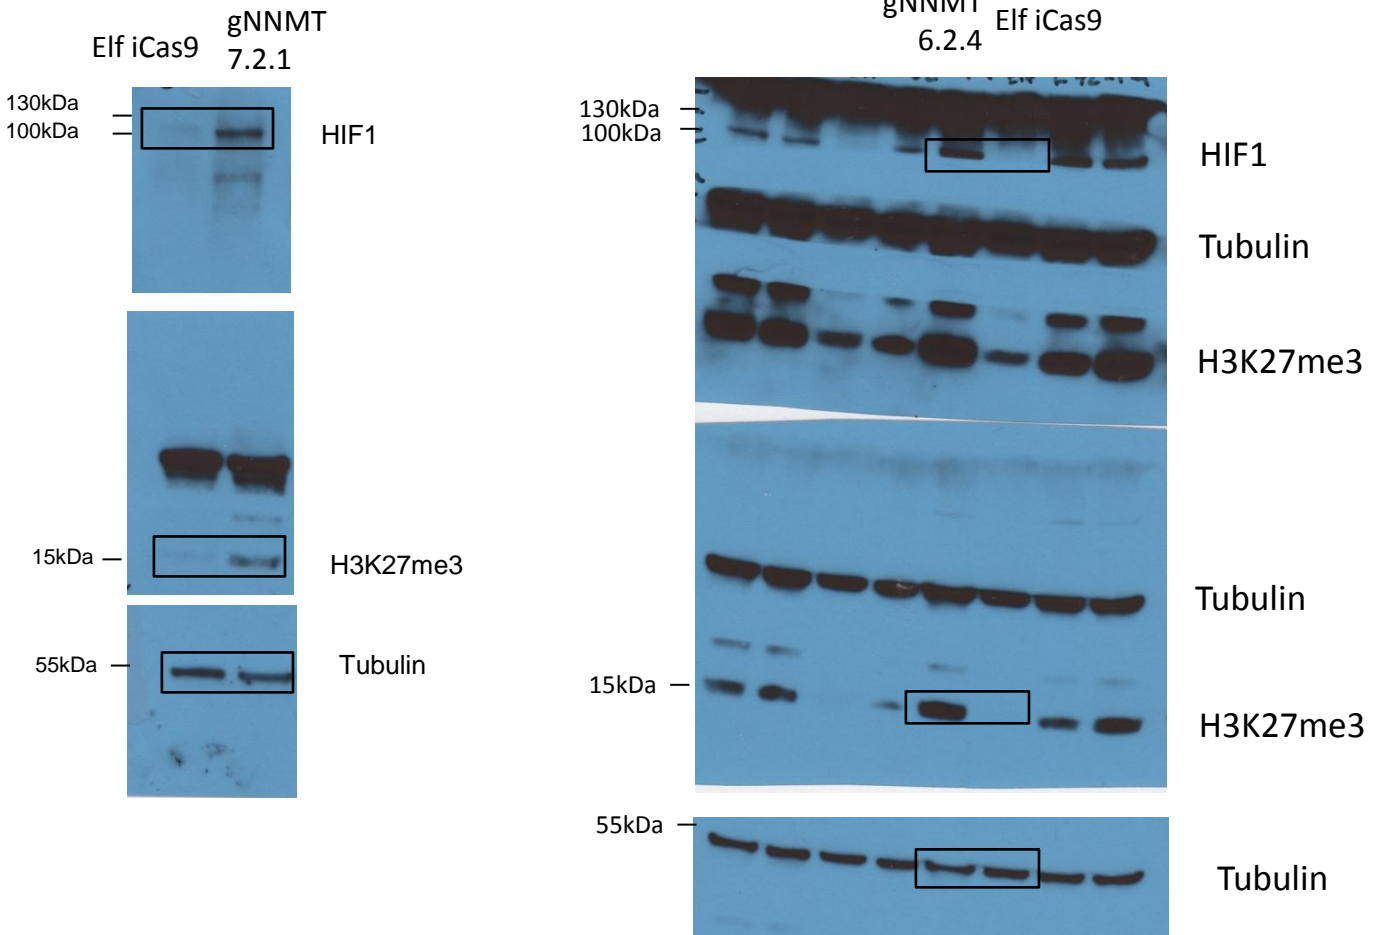

Suppl Fig4I

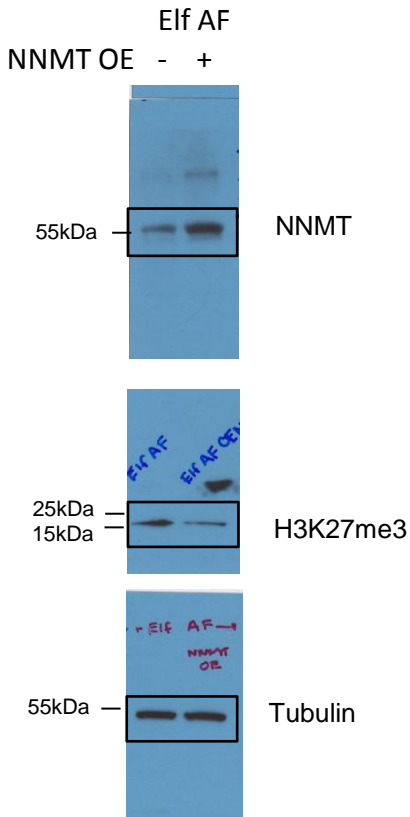

Suppl Fig5H

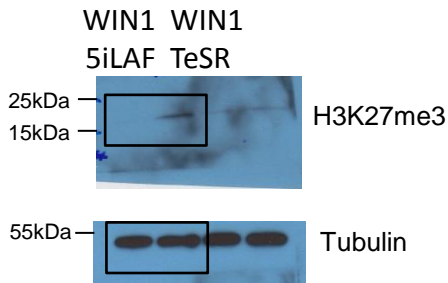

Suppl Fig5L

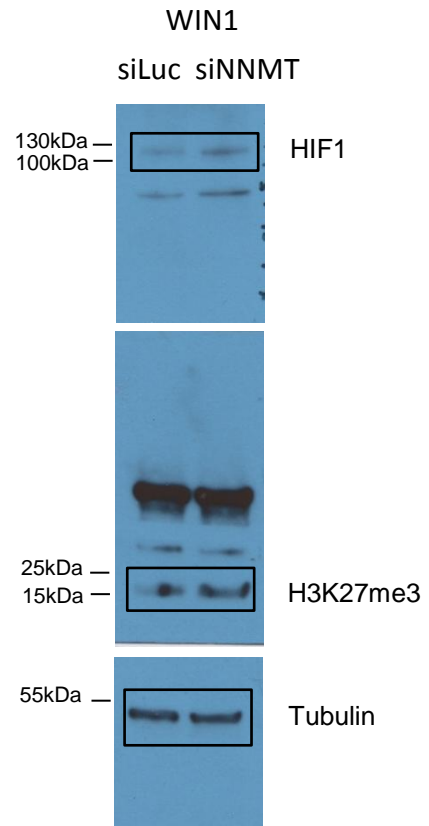

Suppl Fig5M

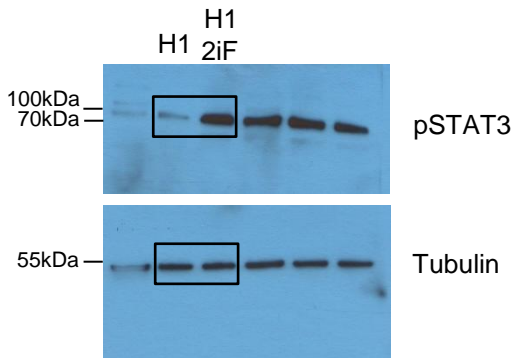

Supplement: NIHMS727862-supplement-10.pdf [file NIHMS727862-supplement-10.pdf]
