# Supplementary material
Source: PubMed Central journal article supplement (PMC4662931)

# Supplemental figure 3

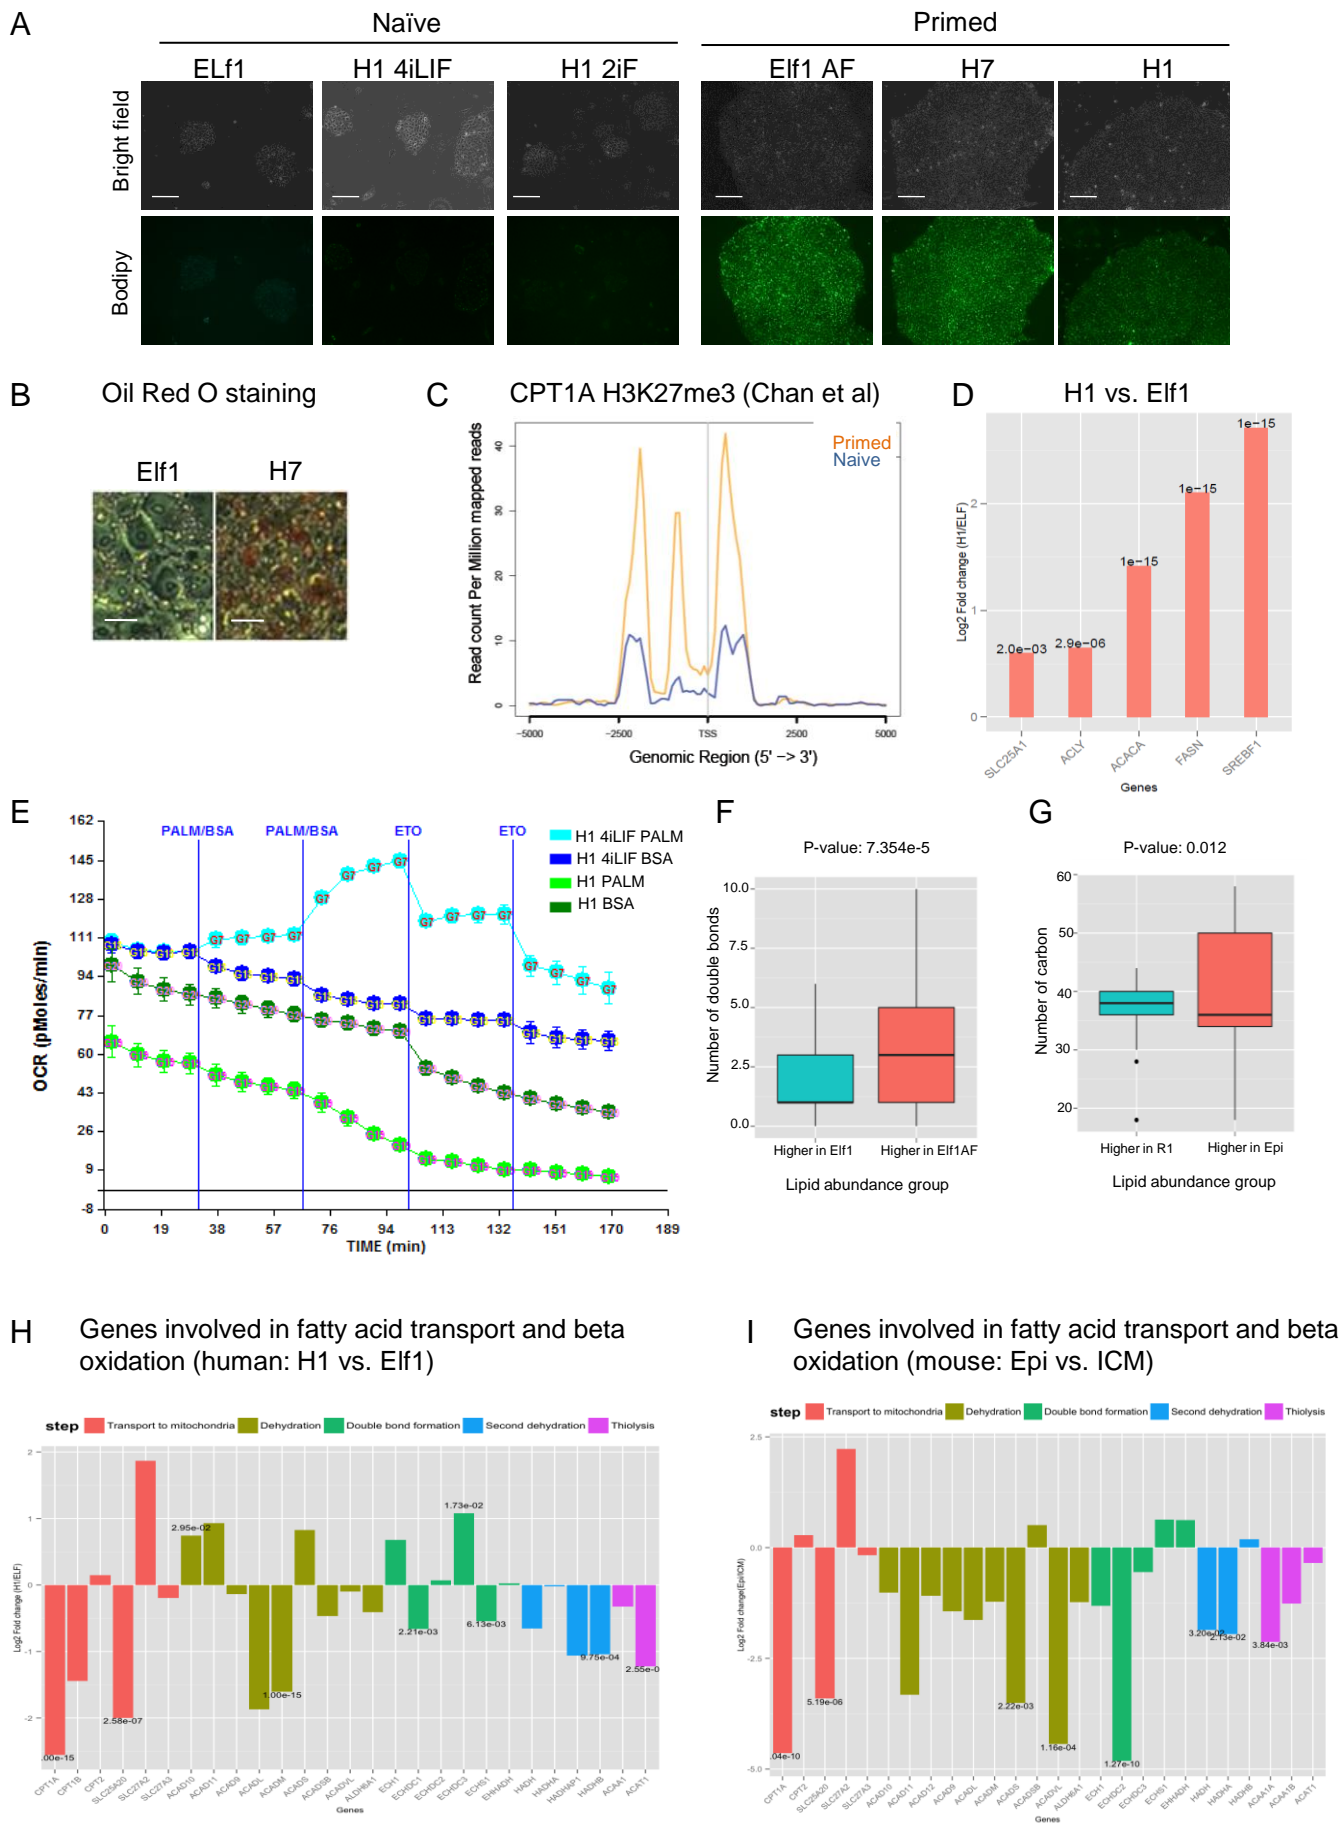

Supplement: NIHMS727862-supplement-4.pdf [file NIHMS727862-supplement-4.pdf]

Supplemental figure 4

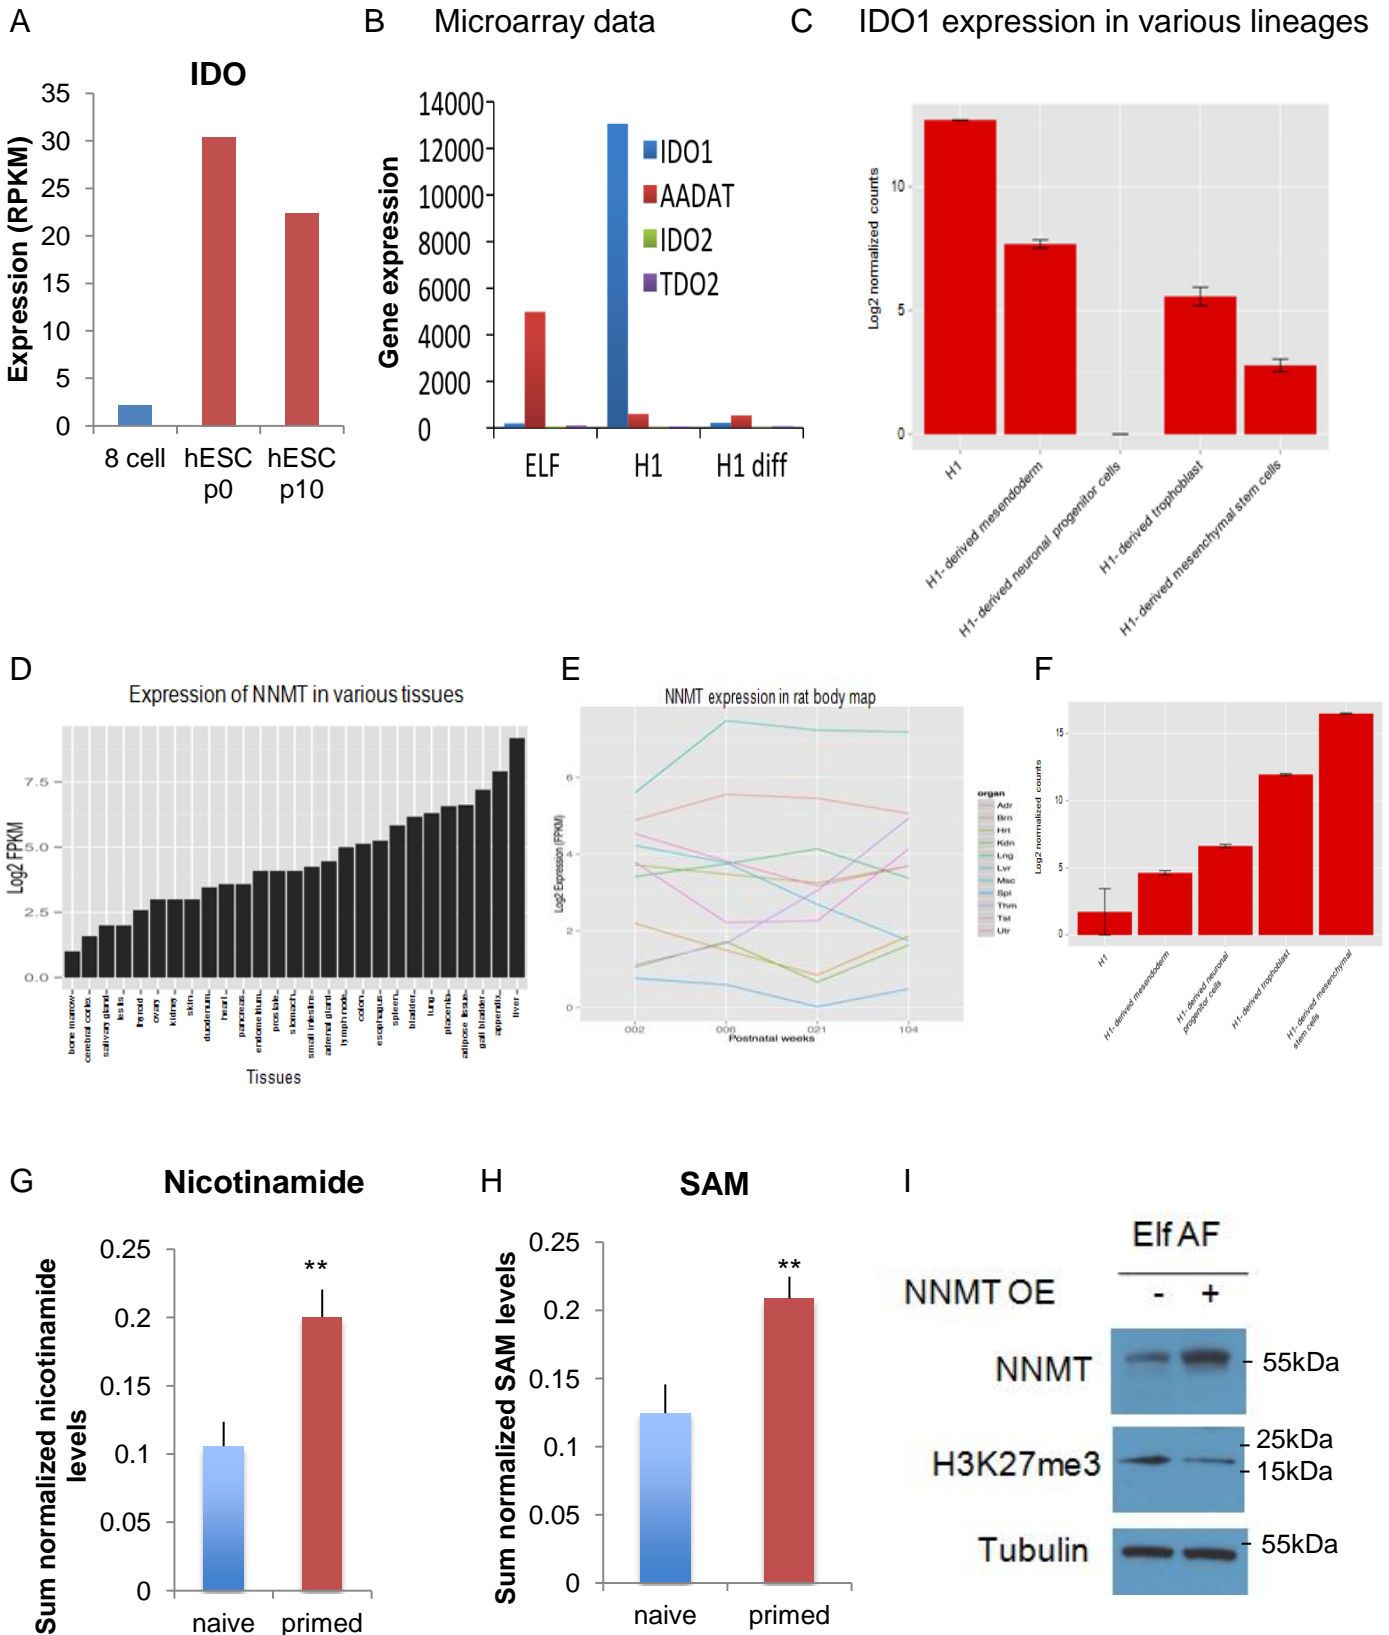

Supplement: NIHMS727862-supplement-5.pdf [file NIHMS727862-supplement-5.pdf]

# Supplemental figure 6

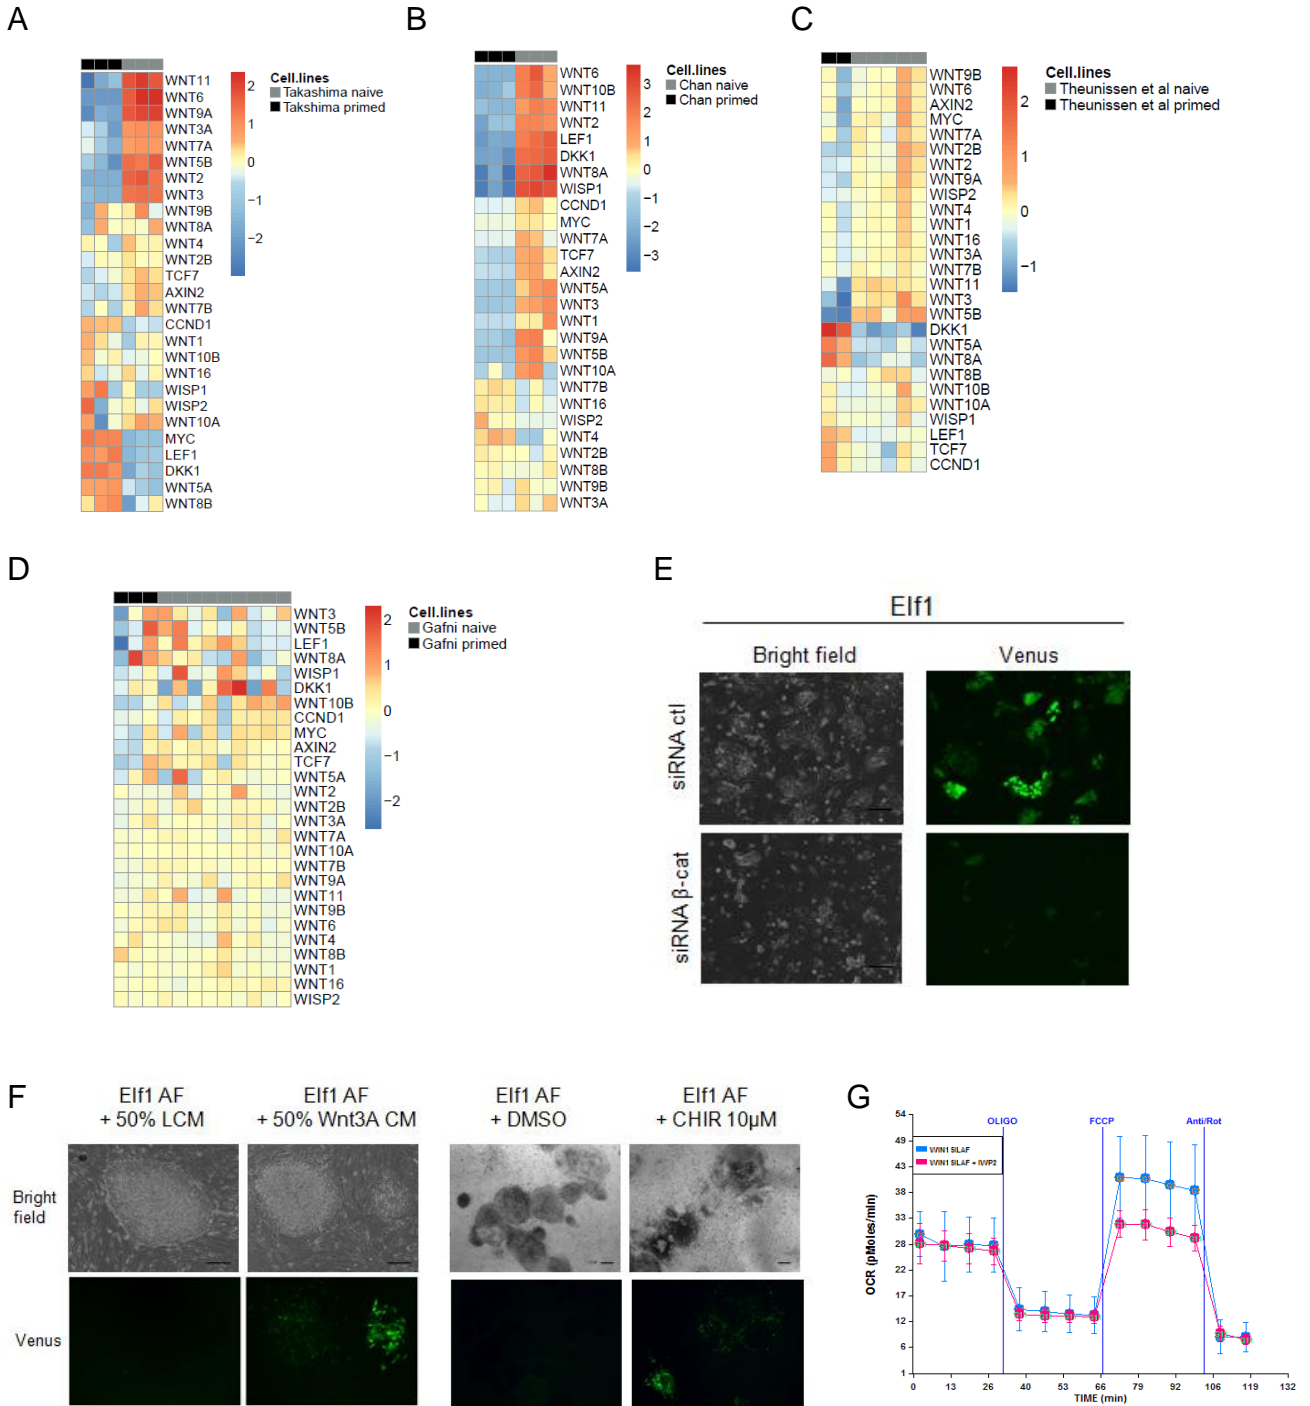

Supplement: NIHMS727862-supplement-7.pdf [file NIHMS727862-supplement-7.pdf]

# Supplemental figure 7

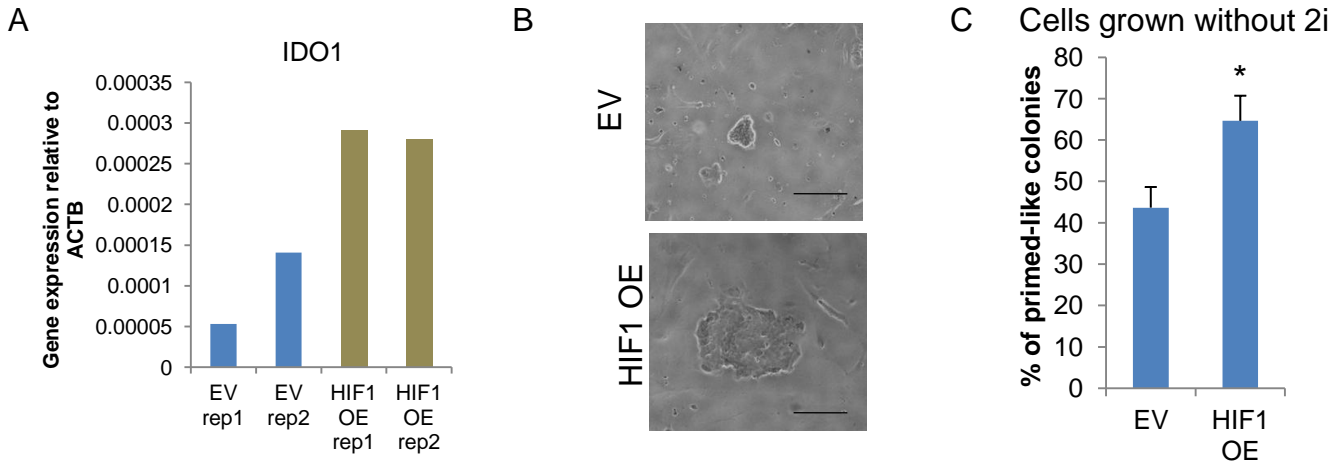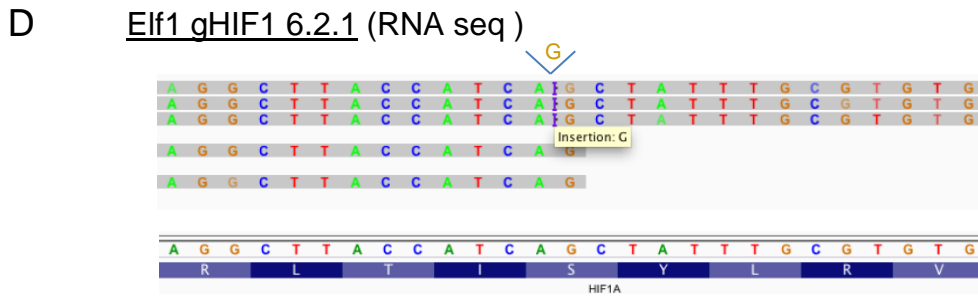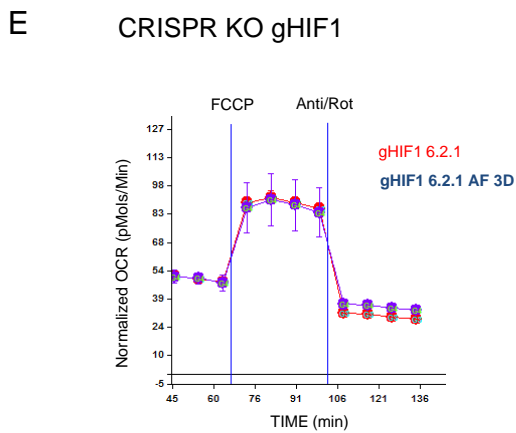

Supplement: NIHMS727862-supplement-8.pdf [file NIHMS727862-supplement-8.pdf]

# Supplemental Figure 8

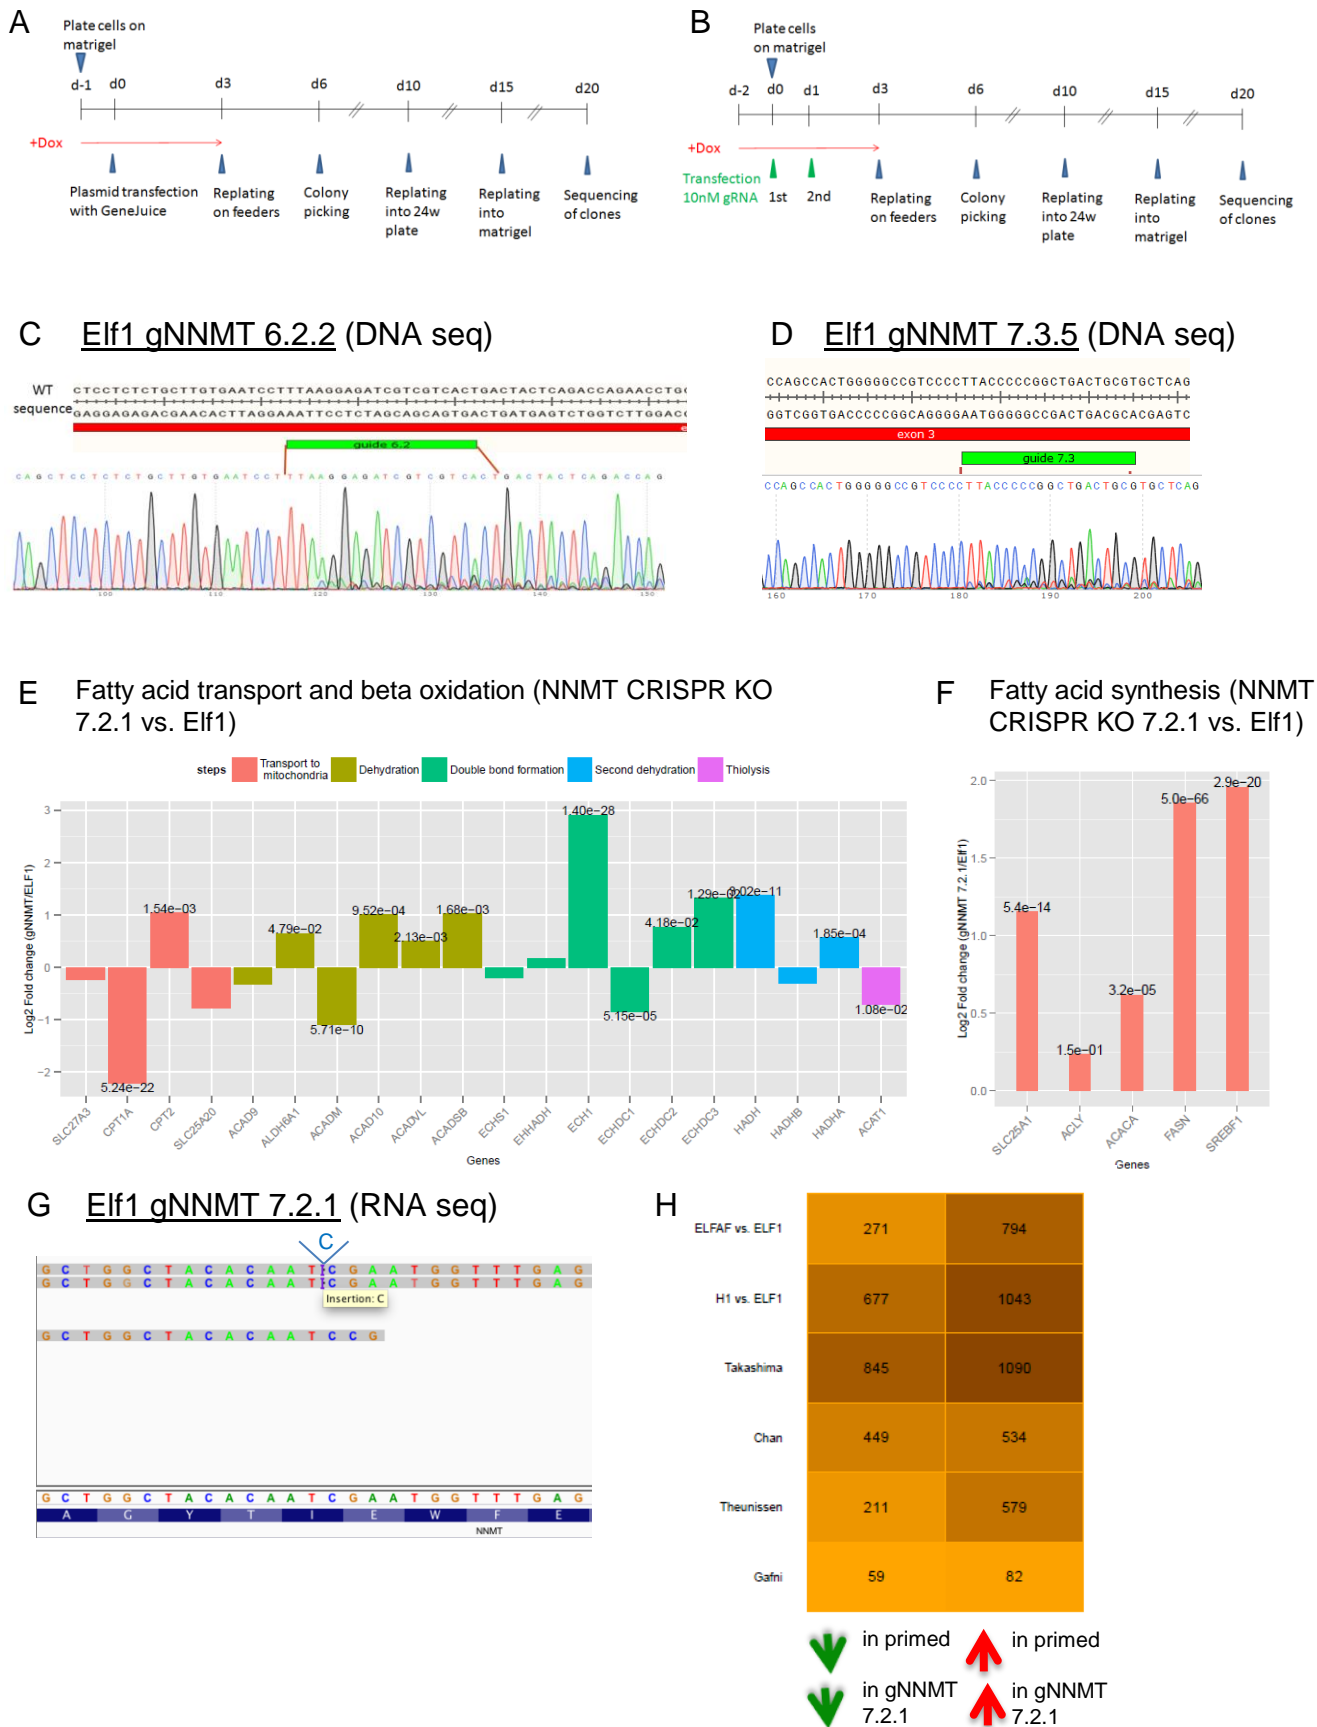

Supplement: NIHMS727862-supplement-9.pdf [file NIHMS727862-supplement-9.pdf]
